# Supplementary material for: A carbon capture and storage technique using gold nanoparticles coupled with Cu-based composited thin film catalysts
Source: Royal Society of Chemistry journal article supplement (doi:10.1039/d2se00817c), 2022-01-01
Supplement: d2se00817c1.pdf [file d2se00817c1.pdf]

# Supporting Information

## Carbon Capture and Storage Technique Using Gold Nanoparticles

### Coupling with Cu-based Compositing Thin Film Catalysts

*Onuma Kaoru<sup>1</sup>, Yan-Jia Huang<sup>1,2</sup>, Zhi-long Yen<sup>3</sup>, Chao-Cheng Kaun<sup>2</sup>, Ya-Ping Hsieh<sup>4</sup>, Yen-Hsun Su<sup>1,\*</sup>*

<sup>1</sup>Department of Materials Science and Engineering, National Cheng Kung University,  
Tainan 70101, Taiwan

<sup>2</sup> Research Center for Applied Sciences, Academia Sinica, Taipei, 11529, Taiwan

<sup>3</sup> Department of Physics, National Taiwan University, Taipei 106, Taiwan

<sup>4</sup> Institute of Atomic and Molecular Sciences, Academia Sinica, Taipei 115, Taiwan

\*Corresponding author's email: [yhsu@mail.ncku.edu.tw](mailto:yhsu@mail.ncku.edu.tw)

Tel: +886-6-275-7575 ext.62941

## Equations

- **Equations for CCS technique<sup>[1]</sup>**

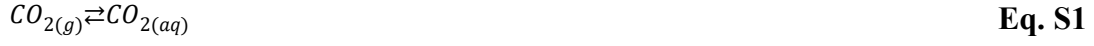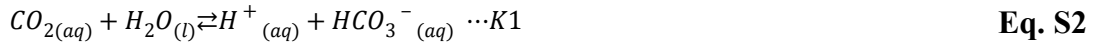

$$K1 = \frac{[HCO_3^-][H^+]}{[CO_{2(aq)}]} \quad \text{Eq. S3}$$

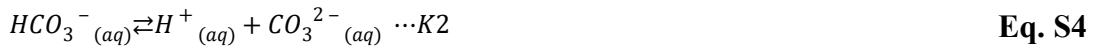

$$K2 = \frac{[CO_3^{2-}][H^+]}{[HCO_3^-]} \quad \text{Eq. S5}$$

- **Equations for CO<sub>2</sub>RR<sup>[2]</sup>**

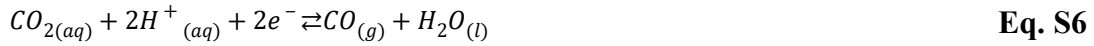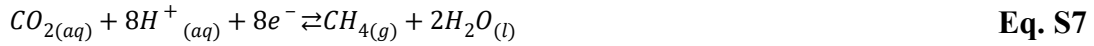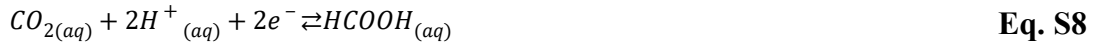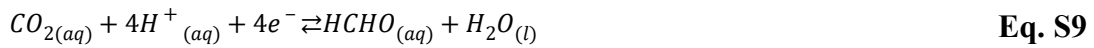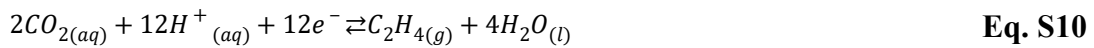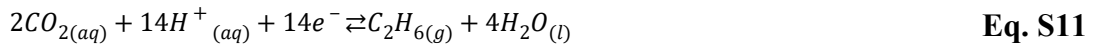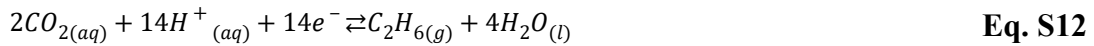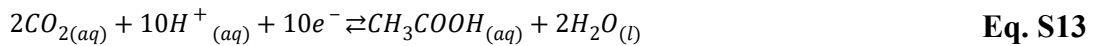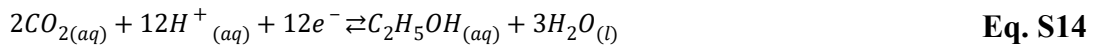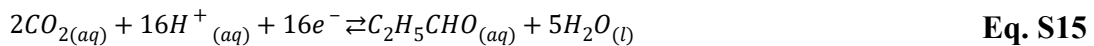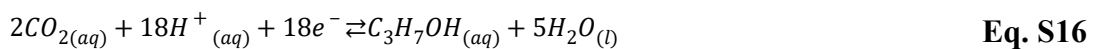

## Experimental Section

- **Synthesis of Au NPs reduced by NaBH<sub>4</sub> (0.1M) and ethylene glycol (EG)**

The other two reduction processes to form Au NPs were operated to compare the optical property with the synthesis of Au NPs reduced by NaBH<sub>4</sub> (0.5M) and ethylene glycol (EG). Similar to the reduction process in section 2.1.1, 0.5 M NaBH<sub>4</sub> powder as the reductant was inserted into 11 mL EG solution which also contained 0.1 M chloroauric acid (HAuCl<sub>4</sub>) and 0.0005 M polyvinylpyrrolidone (PVP). The reduction reaction was completed immediately. The Au NPs also can be obtained by heating the 11 mL EG solution which contained 0.1 M chloroauric acid (HAuCl<sub>4</sub>) and 0.0005 M polyvinylpyrrolidone (PVP) in oil bath at 150°C~160°C for 1 day (Scheme S1). The reduction reaction was completed immediately.

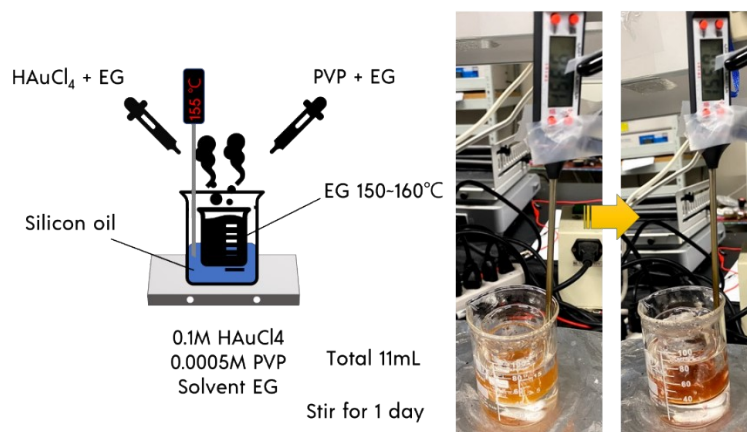

**Scheme S1.** Synthesis of Au NPs prepared from HAuCl<sub>4</sub>, PVP, and EG solution.

Heating the EG solution could reduce the Au<sup>3+</sup> ions in the solution and color could changed from yellow to purple.

## Supporting Figures

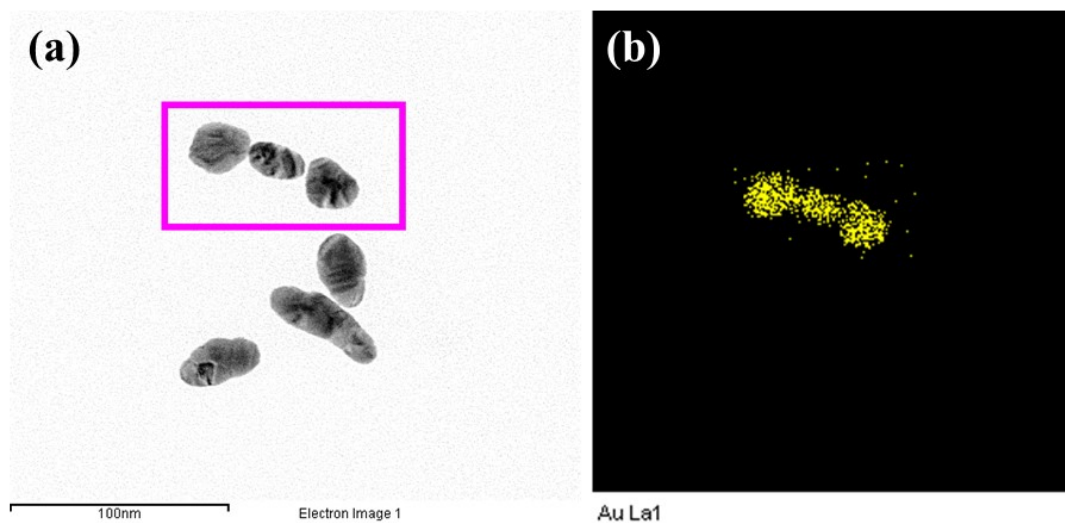

**Figure S1.** (a) TEM image of Au NPs prepared from H<sub>2</sub>AuCl<sub>4</sub>, PVP, NaBH<sub>4</sub>, and EG solution. (b) The EDS analysis corresponding to the purple selection area, the yellow signal is the signal of the gold element.

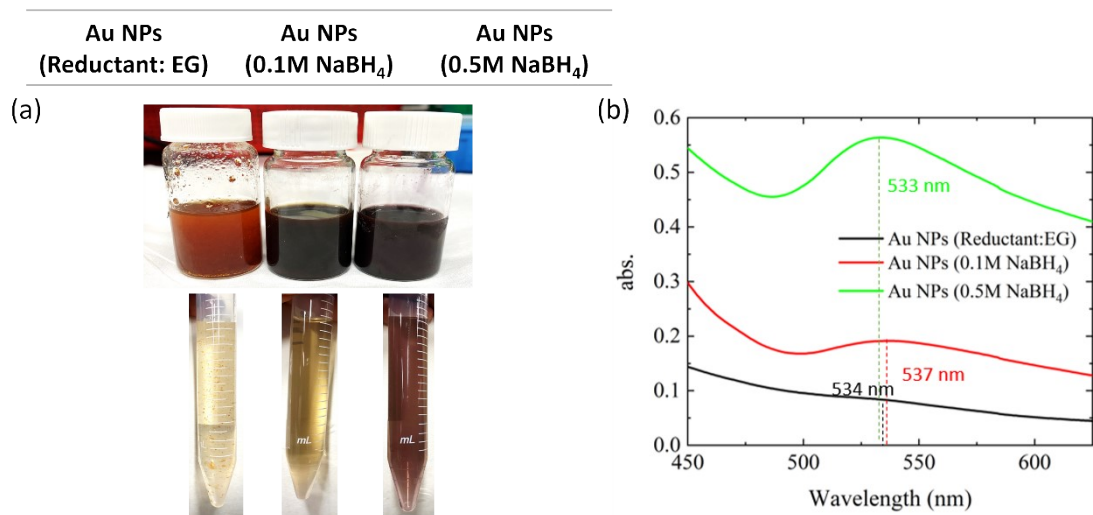

**Figure S2.** (a) The photographs of Au NPs which was reduce by ethylene glycol (EG) with 195°C heated by oil bath, 0.1 M NaBH<sub>4</sub> and 0.5 NaBH<sub>4</sub>. (b) UV-visible curve of Au nanoparticles in different reductants by the range of wavelength 450-650 nm.

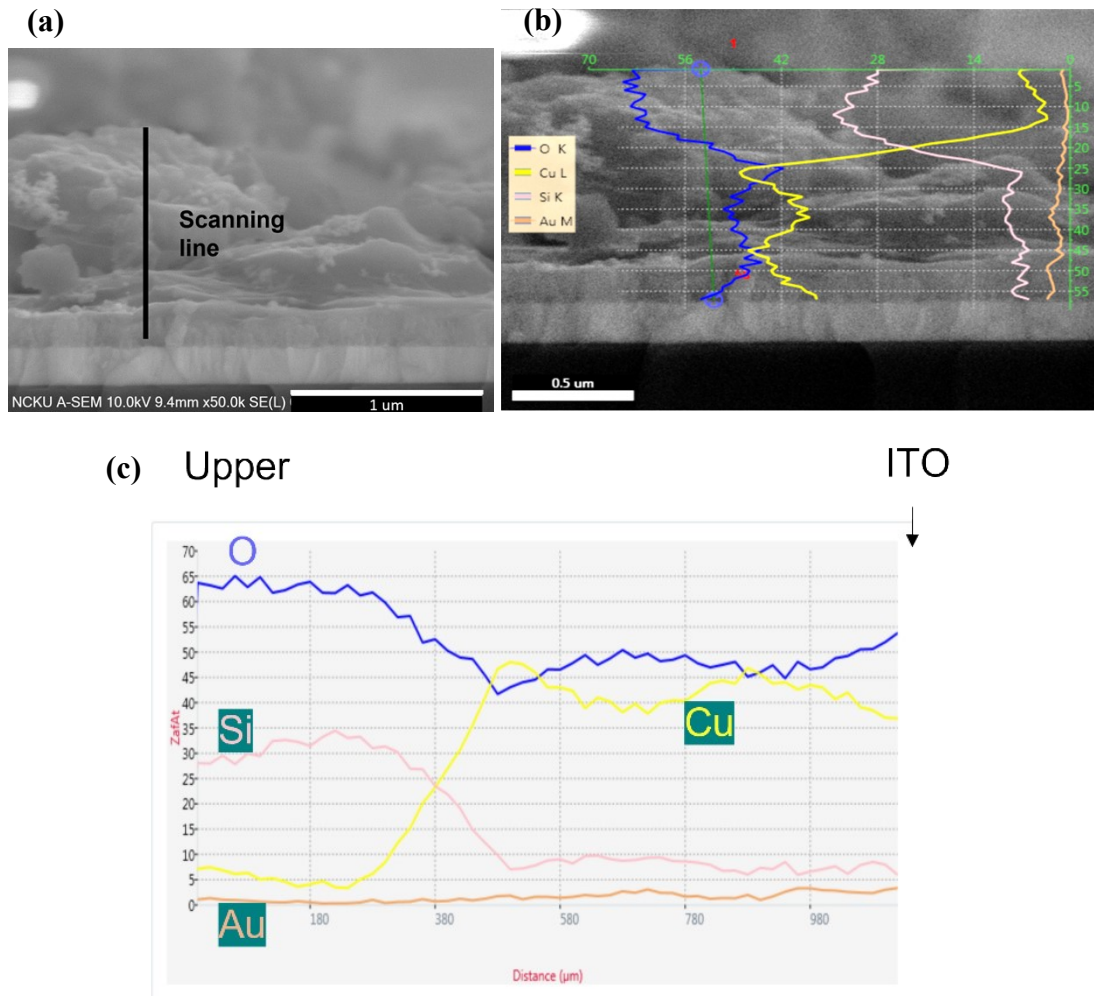

**Figure S3.** In-depth analysis of Au/Cu<sub>2</sub>O composite films. (a) The indicated scanning area; (b) Composition analysis in depth of oxygen, copper, silicon, and gold signals with corresponding SEM image, the horizontal axis is the content (wt %), and the vertical axis is the depth from the surface to the glass substrate; (c) Depth analysis line chart of oxygen, copper, silicon and gold signals.

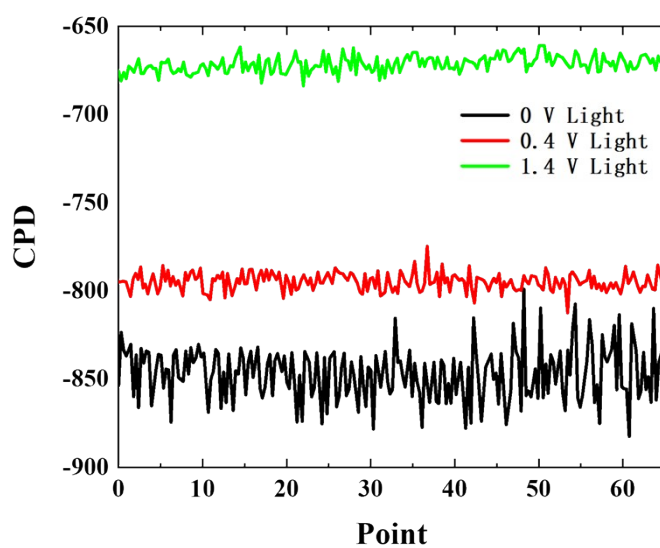

**Figure S4.** The Kelvin probe measurement of different voltage applied Au/Cu<sub>2</sub>O thin film catalysts under AM 1.5 light illumination. The contact potential difference (CPD) between a sample and a tip could be detect and the work function of the sample can be calculated.

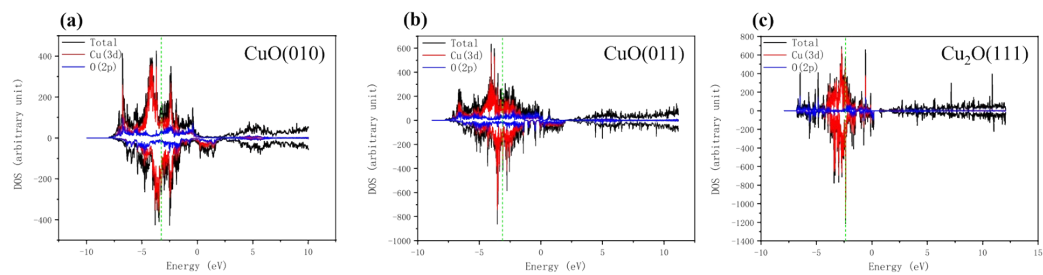

**Figure S5.** Density of states (DOS) and partial density of states (PDOS) of (a)CuO(110), (b)CuO(011) and (c) Cu<sub>2</sub>O(111). Note that the perpendicular green dashed line denotes the d-band center.



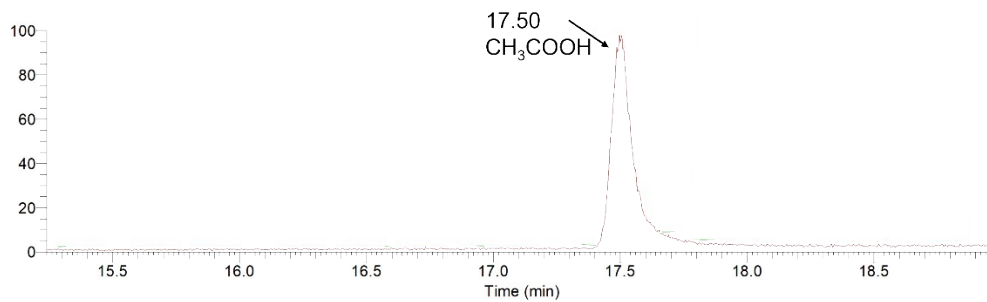

**Supplementary Figure 2.** GC-EID Chromatogram for the analysis of CO<sub>2</sub> reduction liquid product after potentiostatic electrochemical at 1.2V under light illumination for 1 hour. Related Compound was ethanol at the retention time 17.50 min.

## Supporting Table

### Supplementary Table 1.

Elemental composition result of the Cu<sub>2</sub>O thin film which synthesized by electrodeposition process. The SEM image shows indicated area which EDS was analysis in.

| Cu <sub>2</sub> O                                                                 | Element | Weight % | Atomic % |
|-----------------------------------------------------------------------------------|---------|----------|----------|
| 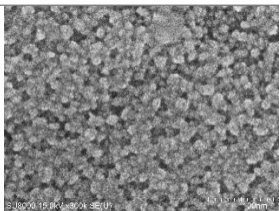 | O K     | 27.53    | 60.14    |
|                                                                                   | Cu L    | 72.47    | 39.86    |

### Supplementary Table 2.

Elemental composition result of the Cu<sub>2</sub>O modified by APTMS (0.1 wt%) mixed with Hexane. The SEM image shows indicated area which EDS was analysis in.

| Cu <sub>2</sub> O-modified by<br>APTMS                                              | Element | Weight % | Atomic % |
|-------------------------------------------------------------------------------------|---------|----------|----------|
| 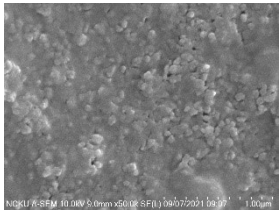 | O K     | 16.43    | 39.72    |
|                                                                                     | Cu L    | 71.35    | 43.45    |
|                                                                                     | Si K    | 12.22    | 16.83    |

### Supplementary Table 3.

Elemental composition result of the Au/Cu<sub>2</sub>O thin film which combined Au NPs with modified Cu<sub>2</sub>O by self-assembly process. The SEM image shows indicated area which EDS was analysis in.

| <b>Cu<sub>2</sub>O-modified by<br/>APTMS</b>                                       | <b>Element</b> | <b>Weight %</b> | <b>Atomic %</b> |
|------------------------------------------------------------------------------------|----------------|-----------------|-----------------|
| 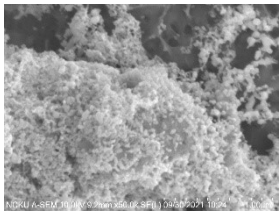 | <b>O K</b>     | <b>10.22</b>    | <b>45.27</b>    |
|                                                                                    | <b>Cu L</b>    | <b>23.29</b>    | <b>25.97</b>    |
|                                                                                    | <b>Si K</b>    | <b>2.24</b>     | <b>5.65</b>     |
|                                                                                    | <b>Au M</b>    | <b>64.24</b>    | <b>23.11</b>    |

## Reference

- [1] Renforth, P. and G. Henderson, *Assessing ocean alkalinity for carbon sequestration*. *Reviews of Geophysics*, 2017. 55(3): p. 636-674.
- [2] Zhao, X., L. Du, B. You, and Y. Sun, *Integrated design for electrocatalytic carbon dioxide reduction*. *Catalysis Science & Technology*, 2020. 10(9): p. 2711-2720.
